# Supplementary material
Source: Springer Nature journal article supplement (https://www.springermedizin.de/resource/supplementary/13058_2011_2932_MOESM1_ESM.pdf/9702794)

**A**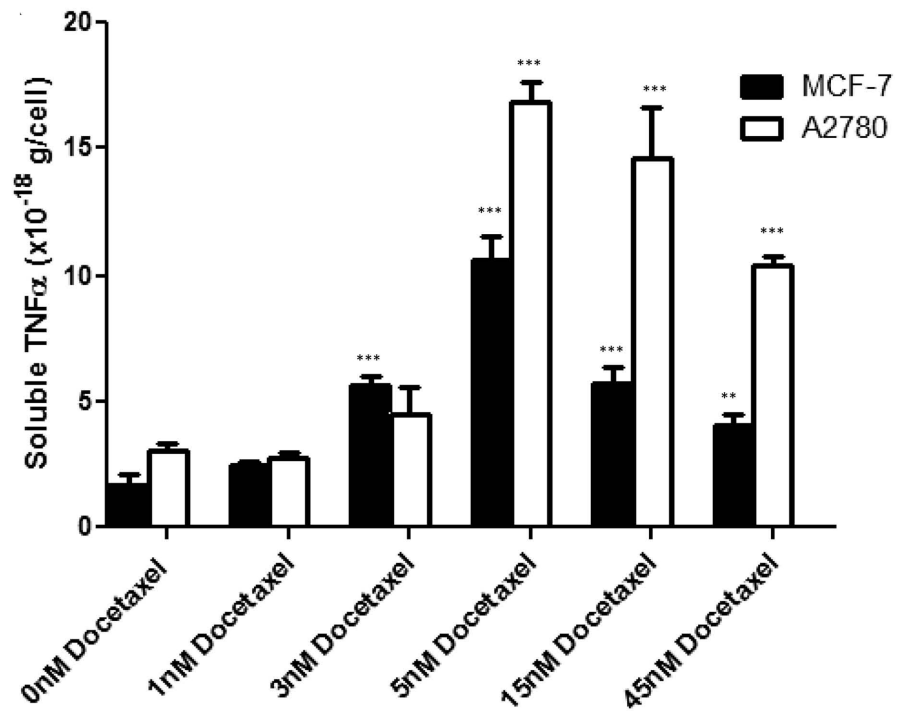**B**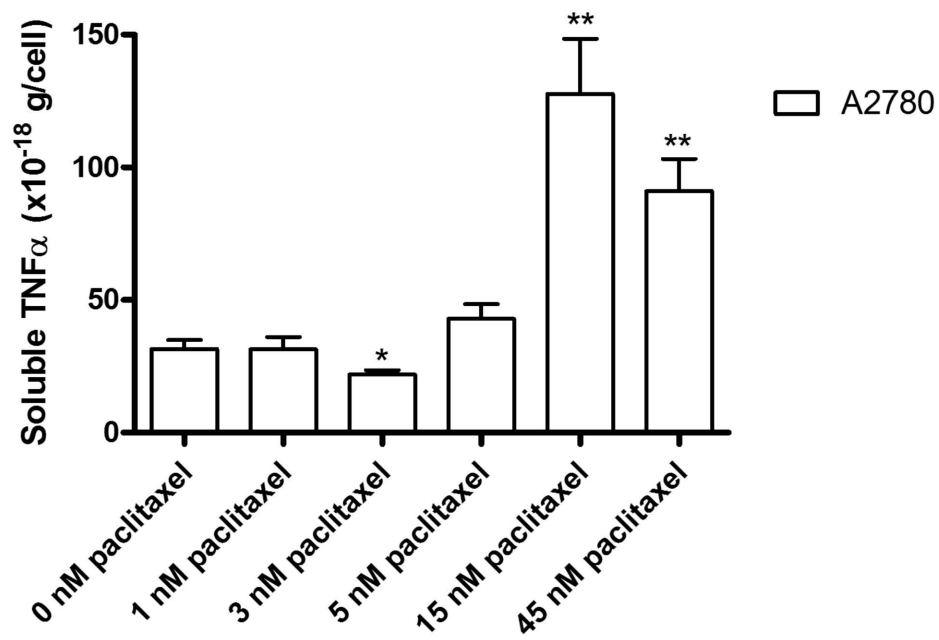**C**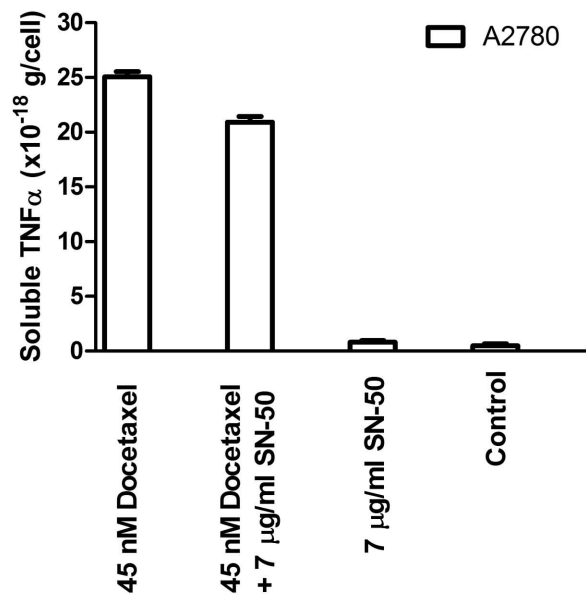

Supplement: MOESM1 [file 9702794]
